# Supplementary material for: Visual detection of telomerase activity with a tunable dynamic range by using a gold nanoparticle probe-based hybridization protection strategy
Source: Royal Society of Chemistry journal article supplement (doi:10.1039/c3nr05185d), 2013-11-22
Supplement: c3nr05185d.pdf [file c3nr05185d.pdf]

## Supporting Information

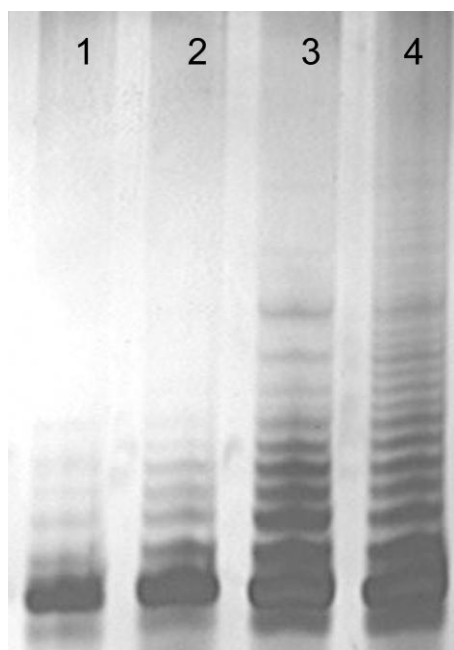

**Figure S1** Conventional TRAP-silver staining assay. Line 1-4 represent telomerase samples extracted from 0, 1000, 3000, 6000 HeLa cells.

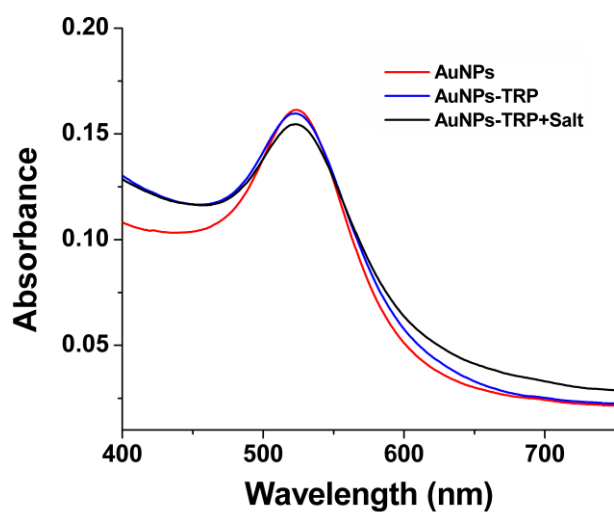

**Figure S2** UV-Vis spectra of AuNPs alone (red line), AuNPs-TRP assembly (blue line), AuNPs-TRP assembly upon addition of salt (black line).

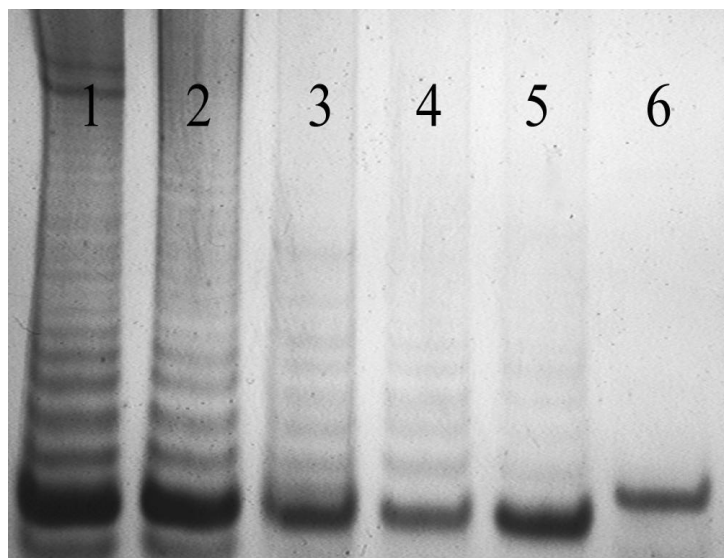

**Figure S3** Inhibition of telomerase activity by curcumin in a classical TRAP assay. Increasing concentrations of curcumin (0-20  $\mu\text{M}$ ) were mixed with telomerase extracted from HeLa cells in a TRAP assay. Line 1-6 represents the reaction with curcumin 0, 1, 2, 5, 10, 20  $\mu\text{M}$ .

**Table S1** The  $\text{IC}_{50}$  of curcumin measured in TRAP assay and TC-AuNP colorimetric assay.

| Method  | $\text{IC}_{50}$ ( $\mu\text{M}$ ) |
|---------|------------------------------------|
| TRAP    | 2.5                                |
| TC-AuNP | 2.8                                |
